# Supplementary material for: Compact SnO2/Mesoporous TiO2 Bilayer Electron Transport Layer for Perovskite Solar Cells Fabricated at Low Process Temperature
Source: MDPI journal article supplement (doi:10.3390/nano12040718), 2022-02-21
Supplement: s1 [file s1]

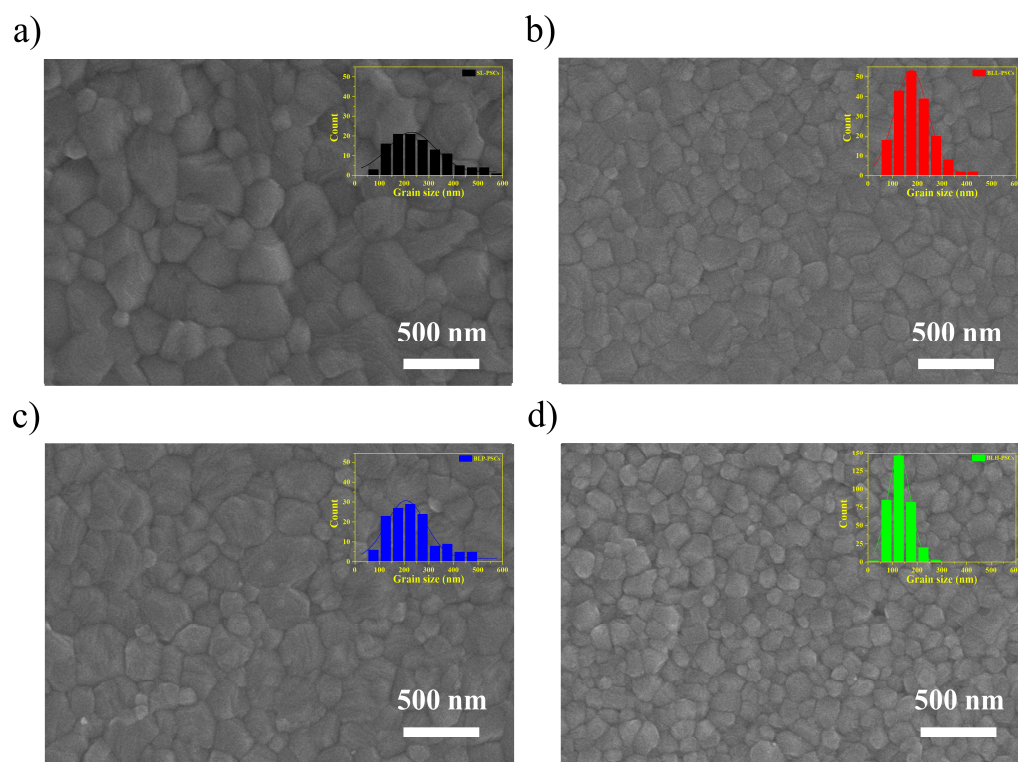

**Figure S1.** Top view SEM images and grain size distribution histograms (inset) of MAPbI<sub>3</sub> layer on (a) SL, (b) BLL, (c) BLP, and (d) BLH.

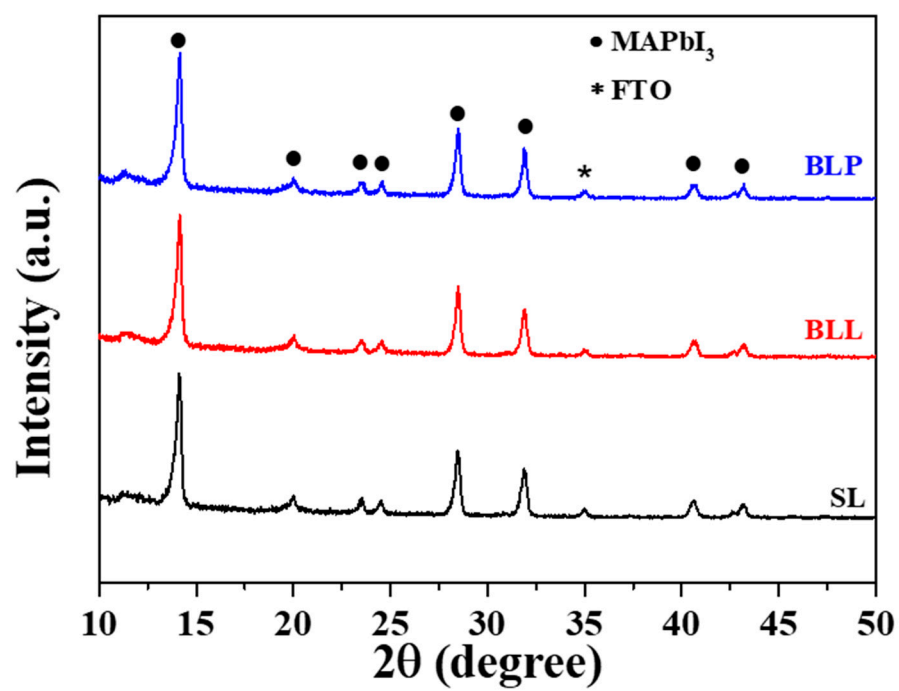

**Figure S2.** XRD pattern of MAPbI<sub>3</sub> layer on BLP, BLL, and SL.

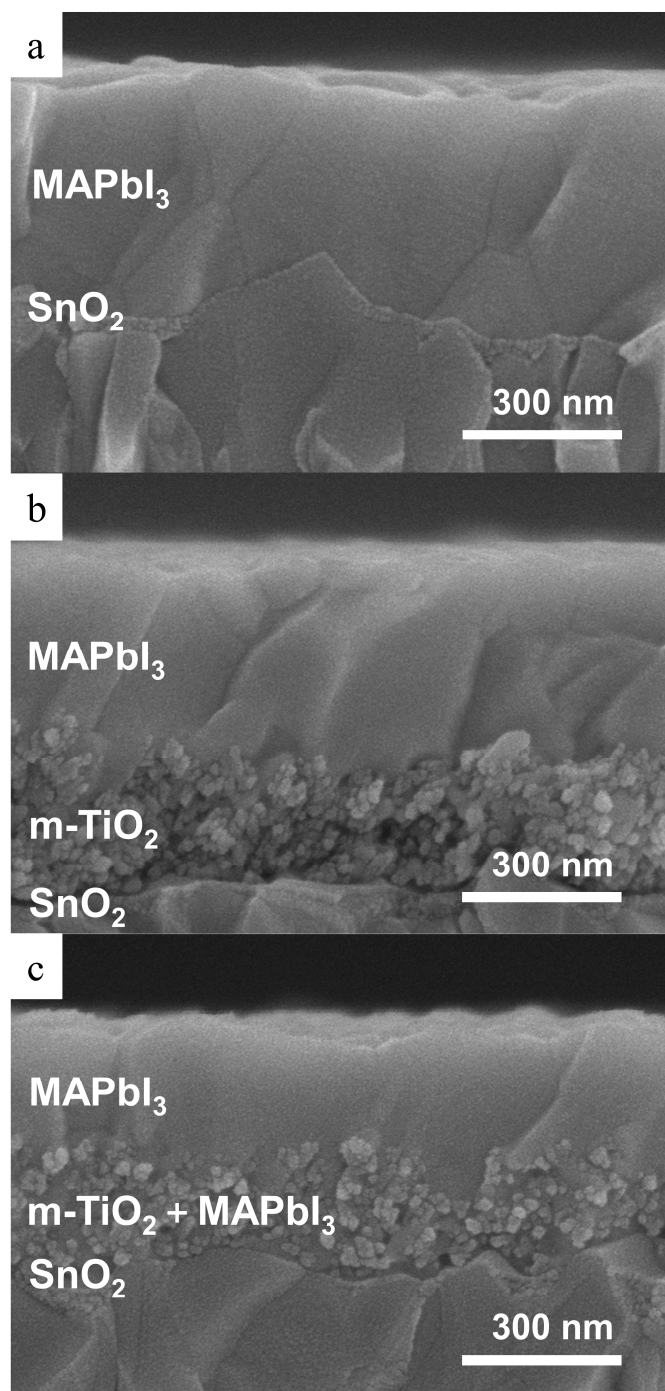

**Figure S3.** Cross-section SEM image of glass/FTO/(a) SL, (b) BLL, and (c) BLP/ $\text{MAPbI}_3$ .

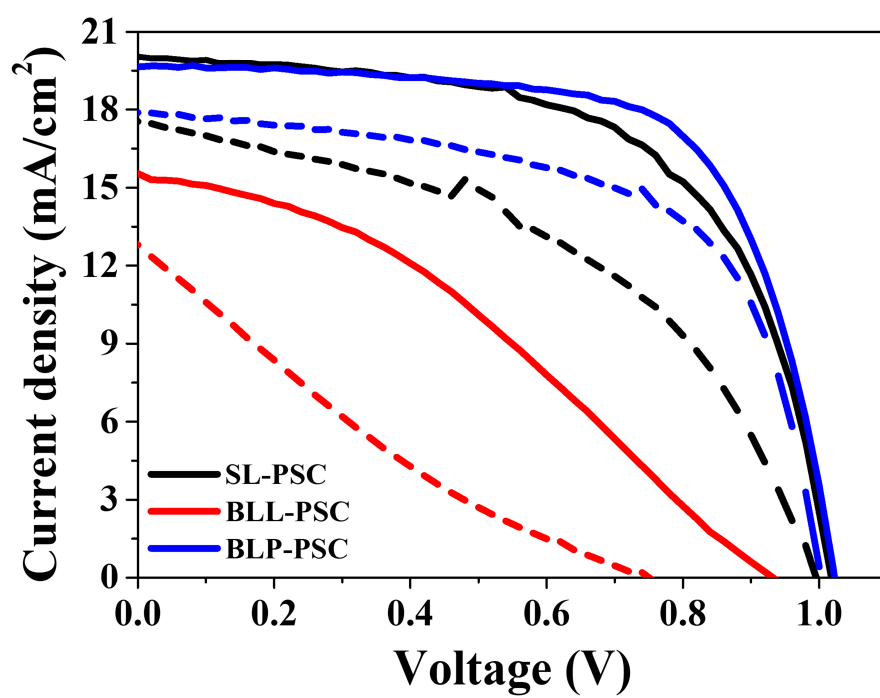

**Figure S4.** Reverse scan (solid line) and forward scan (dotted line) current density-voltage curves of SL-PSC, BLL-PSC, and BLP-PSC.



**Table S1.** Summary of the photovoltaic parameters of PSCs based on SnO<sub>2</sub> ETL annealed at 200 °C, 300 °C, and 400 °C.

| Temperature | J <sub>sc</sub> (mA/cm <sup>2</sup> ) | V <sub>oc</sub> (V) | FF (%) | PCE (%) |
|-------------|---------------------------------------|---------------------|--------|---------|
| 200 °C      | 19.77                                 | 0.99                | 70.22  | 13.68   |
| 300 °C      | 20.00                                 | 0.99                | 61.68  | 12.19   |
| 400 °C      | 16.08                                 | 1.01                | 55.00  | 8.90    |

**Table S2.** Summary of EIS data.

| Sample  | R <sub>s</sub> Value (Ω) | R <sub>ct</sub> Value (Ω) |
|---------|--------------------------|---------------------------|
| SL-PSC  | 27.13                    | 350                       |
| BLL-PSC | 27.85                    | 1900                      |
| BLP-PSC | 27.30                    | 230                       |

**Table S3.** Summary of the photovoltaic parameters of SL-PSC, BLL-PSC, and BLP-PSC according to scan direction.

| Samples      | J <sub>sc</sub> (mA/cm <sup>2</sup> ) | V <sub>oc</sub> (V) | FF (%) | PCE (%) | Hysteresis index |
|--------------|---------------------------------------|---------------------|--------|---------|------------------|
| SL-PSCs (R)  | 20.18                                 | 1.03                | 61.81  | 12.80   | 0.39             |
| SL-PSCs (F)  | 17.55                                 | 1.00                | 46.44  | 8.11    |                  |
| BLL-PSCs (R) | 15.54                                 | 0.93                | 34.99  | 5.07    | 0.65             |
| BLL-PSCs (F) | 12.80                                 | 0.75                | 19.35  | 1.86    |                  |
| BLP-PSCs (R) | 19.65                                 | 1.02                | 67.85  | 13.63   | 0.17             |
| BLP-PSCs (F) | 17.88                                 | 1.00                | 61.71  | 11.06   |                  |

\* Hysteresis index =  $\frac{J_{RS}(0.8V_{OC}) - J_{FS}(0.8V_{OC})}{J_{RS}(0.8V_{OC})}$
